# Massive postglacial gene flow between European white oaks uncovered genes underlying species barriers

Thibault Leroy<sup>1</sup>, Quentin Rougemont<sup>2</sup>, Jean-Luc Dupouey<sup>3</sup>, Catherine  
Bodénès<sup>1</sup>, Céline Lalanne<sup>1</sup>, Caroline Belser<sup>4</sup>, Karine Labadie<sup>4</sup>, Grégoire Le  
Provost<sup>1</sup>, Jean-Marc Aury<sup>4</sup>, Antoine Kremer<sup>1\*</sup>, Christophe Plomion<sup>1</sup>

1/ BIOGECO, INRA, Univ. Bordeaux, 33610 Cestas, France

2/ Département de biologie, Institut de Biologie Intégrative et des Systèmes (IBIS),  
Université Laval, G1V 0A6, Québec, Canada

3/ INRA Université de Lorraine UMR 1137 'Ecologie et Ecophysiologie Forestières', route  
d'Amance, 54280 Champenoux, France

4/ CEA - Institut de Biologie François Jacob, Genoscope, 2 rue Gaston Crémieux, 91057  
Evry, France

**\* Corresponding author:**

Antoine Kremer

INRA, UMR1202 BIOGECO, F-33610 Cestas, France

Phone number: +33(0)5 57 12 28 32

antoine.kremer@inra.fr

**KEYWORDS:**

Genome scan, approximate Bayesian computation, demographic inferences, intrinsic and  
ecological barriers, reproductive isolation

## 23 ABSTRACT

24 Oaks are dominant forest tree species widely distributed across the Northern  
 25 Hemisphere, where they constitute natural resources of economic, ecological, social and  
 26 historical value. Hybridization and adaptive introgression have long been thought to be  
 27 major drivers of their ecological success. Thus, the maintenance of species barriers  
 28 remains a key question, given the extent of interspecific gene flow. In this study, we  
 29 scanned the genomes of four European white oak species for reproductive barriers. We  
 30 identified the ecological and phylogenetic relationships of these species and inferred a  
 31 long-term strict isolation followed by a recent and extensive postglacial contact. Then,  
 32 we made use of the tremendous genetic variation among these species (31 million SNPs)  
 33 to identify genomic regions for reproductive isolation. A literature-based functional  
 34 annotation of the underlying genes highlighted important functions driving the  
 35 reproductive isolation between these sister species. These functions were consistent with  
 36 their ecological preferences and included tolerance to biotic and abiotic constraints. This  
 37 study holds important implications for the renewal of European forests under global  
 38 warming.

39

## 40 MAIN

41 Oaks are a diverse group of about 350 to 500 species widely distributed  
 42 throughout the Northern Hemisphere [1, 2]. The variability in the number of recorded  
 43 oak species highlights the challenge of delineating species limits within a genus  
 44 displaying a high degree of morphological diversity, sometimes described as a “botanic  
 45 horror” by taxonomists [3–5]. Genetic markers have corroborated these taxonomic  
 46 concerns, particularly in European white oaks, which have been the subject of a large  
 47 number of genetic surveys. Studies based on nuclear DNA markers have reported

unambiguously high levels of admixture between European white oak species, confirming the reported taxonomic issues for oaks [6]. Several detailed empirical studies based on chloroplast DNA markers have revealed an absence of private chlorotypes between European white oak species, but congruent associations between chlorotypes and expansion routes during the last postglacial recolonization, suggesting cytoplasmic capture via recurrent hybridization and backcrossing [7, 8]. Recent advances in oak genomics [9, 10] have made it possible to investigate interspecific gene flow at the whole-genome scale. Indeed, Leroy et al. [11] have provided evidence suggesting that extensive secondary contacts have occurred between four European white oak species, probably at start of the current interglacial period. These results reconcile earlier findings of contrasting species differentiation at the nuclear and organelle levels. The inferences drawn are also consistent with the persistence of genomic regions impermeable to gene flow due to functional reproductive barriers, corresponding to a typical case of semi-isolated species [11]. However, the genetic basis of these barriers remains unknown.

Controlled pollination trials have provided empirical evidence for the existence of strong reproductive barriers in these four European white oak species [12, 13]. Ecological preferences *in situ* have also been previously reported, with tolerance to dry (*Q. petraea*) or wet (*Q. robur*) sites [14], or acidic (*Q. pyrenaica*) or limy (*Q. pubescens*) soils [15] but fine-grained ecological surveys do not yet exist for all these four species. The four species occupy different geographic ranges (Fig 1A): extending up to Scandinavia for *Q. petraea* and *Q. robur*, whereas the other two species are present mostly in Mediterranean and sub-Mediterranean regions. However, the distribution ranges of these species overlap in some areas, mostly in South-West France, but the four species are rarely found together in the same stand [but see ref. 6]. The overlapping species ranges in South-West France thus provide an ideal “natural laboratory” [16] for investigating reproductive barriers between these European white oak species.

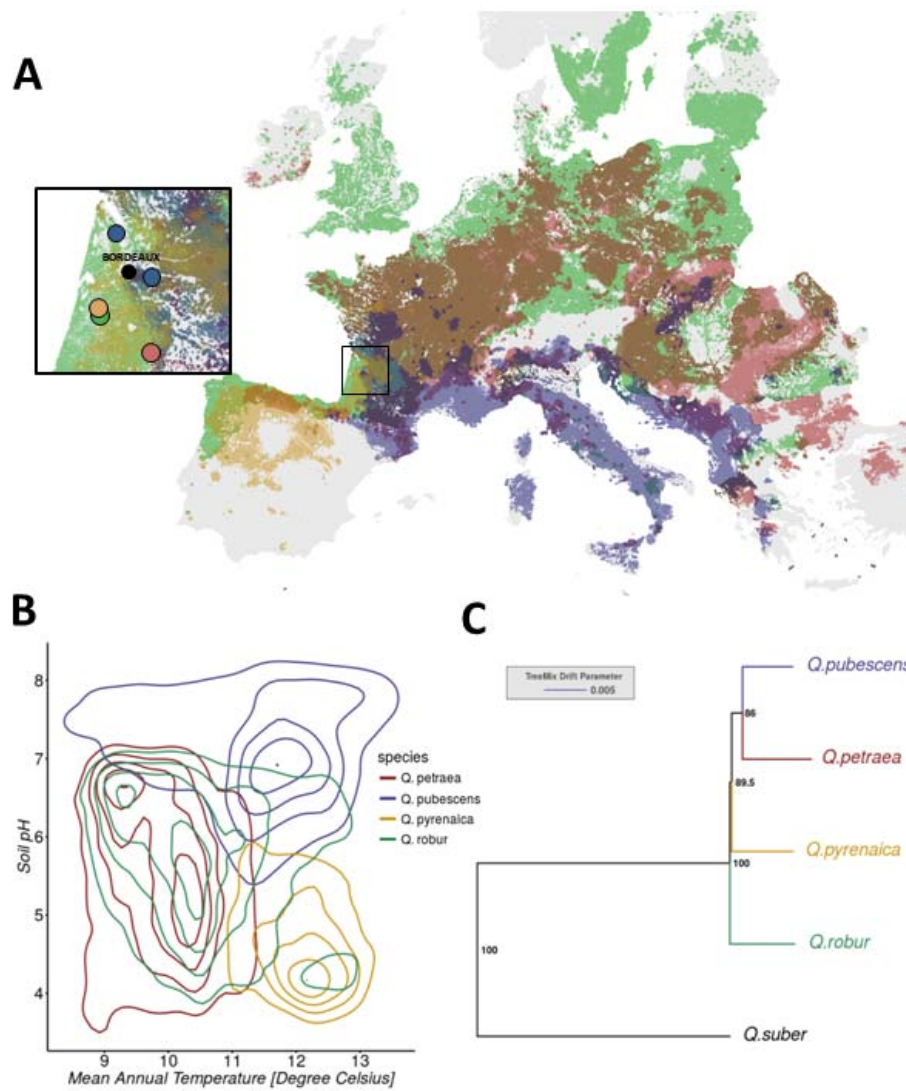

74  
75

76 **Figure 1: Continental-scale species distributions and origin of the study material (A)**  
77 **and, ecological (B) and phylogenetic relationships of the four European white oak species**  
78 **under investigation (C).**

79

Here we combined state-of-the-art methods in population genomics to explore the genomic distribution of reproductive barriers (Fig. 1): (i) we used approximate Bayesian computation (ABC) to perform ascertainment bias-free demographic inferences in order to refine estimates of the timing of secondary contacts, and (ii) scan genomes for reproductive barriers. Our findings identified important intrinsic and ecological functions driving the reproductive isolation of these four oak species including tolerance to biotic and abiotic constraints, and intrinsic mating barriers.

87

## 88 RESULTS

### 89 Ecological preferences of the four species

We intersected the distribution maps of the four species (Fig. 1A) with climatic and soil data derived from a large-scale floristic survey in France. Bivariate density distributions (Fig. 1B) show clear patterns of ecological preferences among the four white oak species. As expected, the two so called temperate white oaks (*Q. petraea* and *Q. robur*) are more frequently observed under cooler climates than Mediterranean and sub-Mediterranean species (*Q. pubescens* and *Q. pyrenaica*). pH of the soils segregates particularly *Q. pyrenaica* from *Q. pubescens*. Although we could not combine climatic and soil data over the whole species' ranges, univariate density distributions for both climate (Fig S1) and soil pH (Fig S2) based on continental-scale data showed similar trends.

99

### 100 Divergence and post-glacial secondary contact between European white oaks

A total of 31,894,340 SNPs were identified after the filtering of variants with a low minor allele frequency (MAF<0.02) in population samples for the four species (*Q. petraea*, *Q. robur*, *Q. pubescens*, *Q. pyrenaica*), corresponding to one SNP every 23.2 bp,

on average. We also used genome-wide data for a *Q. suber* accession described by Leroy *et al.* [11] to root a phylogenetic tree and investigate relationships between species for 9,084,835 of the 31.9 million SNPs. The best maximum-likelihood tree suggested that *Q. robur* initially diverged from the ancestor of the other three species (Fig. 1C).

We then randomly selected 50,088 SNPs from the entire set of 31.9 million SNPs for ascertainment bias-free demographic ABC inference. We compared two models of divergence with gene flow (Fig. 2) for each of the six possible species pairs: an isolation-with-migration model assuming constant gene flow since the divergence time ( $T_{\text{SPLIT}}$ ), and a model assuming secondary contact with gene flow starting at  $T_{\text{SC}}$ , a time point after divergence ( $T_{\text{SC}} < T_{\text{SPLIT}}$ ). For all pairs, we obtained strong statistical support for the secondary contact model (>98% posterior probability, Tables 1 & S1), consistent with our previous findings based on individual data for 3,524 SNPs [11].

We generated parameter estimates under the best-fitting secondary contact model for each pair of species. Taking into account the 95% confidence intervals for each  $T_{\text{SC}}/T_{\text{SPLIT}}$  ratio (Tables 1 & S2) and the divergence time between these species (1-10 million years, [2, 17], the analysis yielded quite large estimates with secondary contact occurring between 100 and 62,400 years ago, corresponding to up to 1,225 generations, assuming a generation time of 50 years [18]. Even assuming the upper bound for the divergence between these species (10mya [17]), median estimates of the timing of secondary contacts had much less variation and ranged between 2,450 and 21,760 years (up to 435 generations). These estimates are consistent with the general hypothesis of a resumption of secondary gene flow at the start of the current interglacial period.

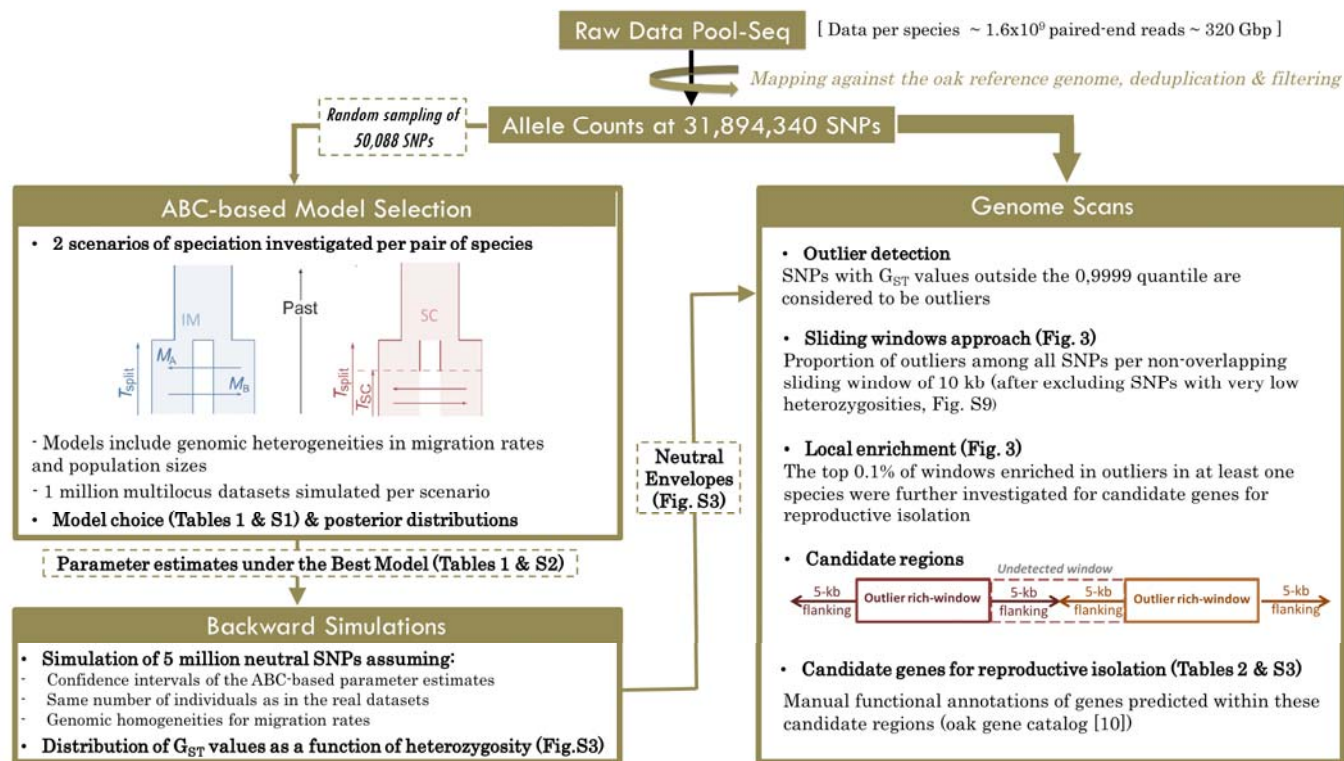

128

129 **Figure 2: Workflow used to identify genes contributing to reproductive isolation between four European white oak species.** A subset of 50  
 130 thousand of the called SNPs was selected at random and used for model selection under an ABC framework and the generation of  
 131 parameter estimates under the best model. Large neutral datasets were then simulated to create null envelopes for the identification of  
 132 SNPs displaying significant departure from expectations under neutrality. We searched for candidate genes in regions enriched in  
 133 outliers.

134 **Table 1: Posterior probabilities of the SC scenario and timing of secondary contacts.**  
 135 Mean (**bold**) relative posterior probability of the secondary contact scenario and standard  
 136 deviation (round brackets). Median (**bold**) and 95% confidence intervals (square brackets)  
 137 for both the inferred ratio between divergence time ( $T_{SPLIT}$ ) and time of the secondary  
 138 contact ( $T_{SC}$ ) and the secondary contact (expressed in number of years) after setting  
 139  $T_{SPLIT}$  to 10 million years (the upper bound for the divergence of this species  
 140 complex,[17]). More details are given in Tables S1 & S2.

141

| Pair                                         | Post. Probability<br>SC      | $T_{SC}/T_{SPLIT}$ estimates                                     | $T_{SC}$<br>(years ago)         |
|----------------------------------------------|------------------------------|------------------------------------------------------------------|---------------------------------|
| <i>Q. robur</i> – <i>Q. petraea</i>          | <b>0.98883</b><br>(±0.01089) | <b>1.487 x 10<sup>-3</sup></b><br>[0.43-4.05] x 10 <sup>-3</sup> | <b>14,870</b><br>[4,300-40,500] |
| <i>Q. robur</i> – <i>Q. pyrenaica</i>        | <b>0.99249</b><br>(±0.01152) | <b>1.197 x 10<sup>-3</sup></b><br>[0.31-4.95] x 10 <sup>-3</sup> | <b>11,970</b><br>[3,100-40,500] |
| <i>Q. robur</i> – <i>Q. pubescens</i>        | <b>0.98719</b><br>(±0.01342) | <b>0.245 x 10<sup>-3</sup></b><br>[0.09-0.72] x 10 <sup>-3</sup> | <b>2,450</b><br>[900-7,200]     |
| <i>Q. pubescens</i> –<br><i>Q. petraea</i>   | <b>0.98549</b><br>(±0.02231) | <b>2.176 x 10<sup>-3</sup></b><br>[0.77-6.24] x 10 <sup>-3</sup> | <b>21,760</b><br>[7,700-62,400] |
| <i>Q. pubescens</i> –<br><i>Q. pyrenaica</i> | <b>0.99087</b><br>(±0.01152) | <b>0.865 x 10<sup>-3</sup></b><br>[0.32-2.16] x 10 <sup>-3</sup> | <b>8,650</b><br>[3,200-21,600]  |
| <i>Q. pyrenaica</i> –<br><i>Q. petraea</i>   | <b>0.99378</b><br>(±0.00697) | <b>0.383 x 10<sup>-3</sup></b><br>[0.10-1.14] x 10 <sup>-3</sup> | <b>3,830</b><br>[1,000-11,400]  |

142



# Narrow regions of non-neutral evolution

We then took advantage of these demographic inferences to perform differentiation outlier tests. We performed extensive backward simulations (5,000,000 independent SNPs) under the best inferred scenario to generate null distributions for each pairwise comparison (Fig. S3, see also *Online Results*). The most outlier-enriched windows were retained for the identification of candidate genes underlying species barriers. We identified 281 windows containing the highest proportion of outliers (top 0.1% of window enriched in outliers for at least one pair of species). We then analyzed the clustering of these outlier-enriched windows. We defined a candidate genomic region by merging close windows, *e.g.* two contiguous sequences of two outlier-enriched windows, with possible interruption by a single undetected window (Fig. 2). The 281 windows were distributed over 215 candidate genomic regions, distributed over all chromosomes (blue lines, Fig. 3).

We listed all the *Quercus* genes located within or flanking these 215 genomic regions. We identified 227 genes distributed over 133 of the 215 regions, with very few candidates per region (mean:  $1.71 \pm 1.76$  genes per region,  $1.49 \pm 0.82$  genes after excluding 5 regions with chloroplast-like DNA signatures). We subdivided genes into three major functional categories, and particularly focused on 32 candidate genes based on quality and sharpness of the annotations in terms of physiological function (Table 2, see also Sup Info). The first category comprises genes underlying the ecological preferences of the four species: tolerance of water deficit, cold tolerance, adaptation to alkaline soils. The second includes genes involved in biotic interactions, such as immune responses, resistance to biotic stresses, and mycorrhization. The third gathers to genes probably contributing to intrinsic barriers, and includes genes with functions related to flowering time, pollen recognition, pollen growth and embryo development.

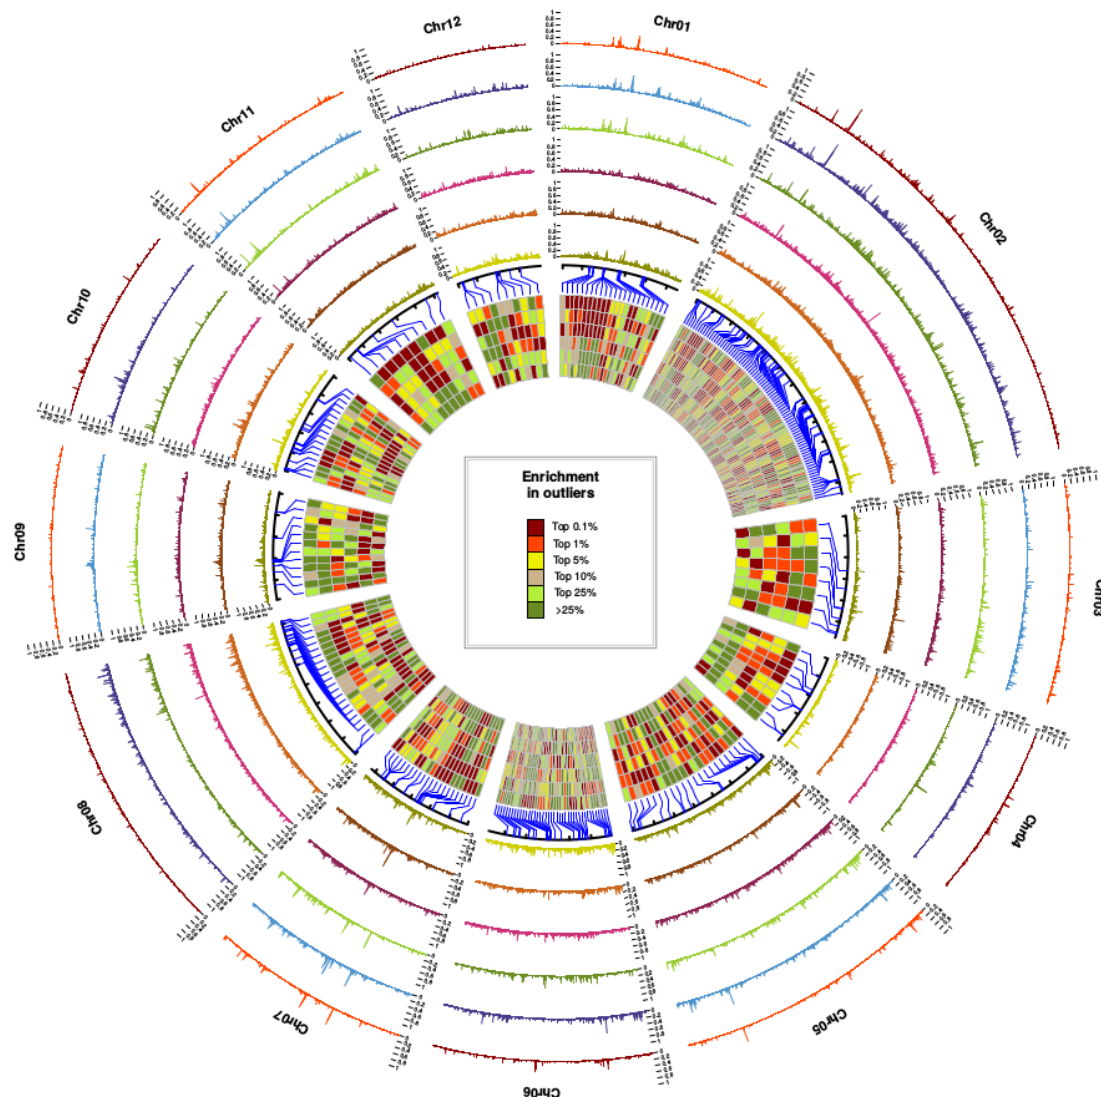

169

170 **Fig. 3: Local density in outliers per non-overlapping 10 kb sliding window.** From outside  
 171 to inside, the species pairs are *Q. robur*/*Q. petraea*, *Q. pyrenaica*/*Q. petraea*, *Q.*  
 172 *pubescens*/*Q. petraea*, *Q. robur*/*Q. pubescens*, *Q. robur*/*Q. pyrenaica* and *Q. pubescens*/*Q.*  
 173 *pyrenaica*. Detailed patterns are accessible from:  
 174 <https://github.com/ThibaultLeroyFr/GenomeScansByABC/>. Each rectangle in the inner  
 175 circle represents the level of enrichment in outliers with  $He \leq 0.2$  for each pair of species  
 176 at a given position in the genome, assuming the same order of pairs. These rectangles  
 177 correspond to the 281 most outlier-enriched windows found in at least one of the six  
 178 pairs (top 0.1%).

179 **Table 2: Genomic positions, gene names, annotations for 32 candidate genes.** All other annotations are available in Table S3 (see FileS1  
180 for details, including references). Species patterns were determined from the analysis of the most outlier-enriched windows between  
181 pairs, as detailed in Table S4.  
182

| <i>chr.</i>                                                                                                    | <i>positions (regions)</i> | <i>Candidate gene</i> | <i>Gene name</i>                                           | <i>Gene functions</i>                                        | <i>#Paralogs</i> | <i>Pattern</i>            |
|----------------------------------------------------------------------------------------------------------------|----------------------------|-----------------------|------------------------------------------------------------|--------------------------------------------------------------|------------------|---------------------------|
| <i>Intrinsic barriers</i>                                                                                      |                            |                       |                                                            |                                                              |                  |                           |
| <i>Flowering</i>                                                                                               |                            |                       |                                                            |                                                              |                  |                           |
| Chr08                                                                                                          | 62493250-62513250          | Qrob_P0412860.2       | Two-component response regulator-like PRR73                | photoperiodic flowering response, circadian clock            | 1                | Complex                   |
| Chr08                                                                                                          | 62673250-62693250          | Qrob_P0749650.2       | Floral homeotic protein APETALA 2   Transcr. factor RAP2-7 | Delay transition to flowering time, biotic/abiotic stresses  | 0                | Complex                   |
| Chr07                                                                                                          | 44592072-44632072          | Qrob_P0088630.2       | Transcr. activator DEMETER (DME) / protein ROS1-like       | Transcriptional activator required for floral development    | 1                | Complex                   |
| <i>Pollen development (Cycloartenol synthases)</i>                                                             |                            |                       |                                                            |                                                              |                  |                           |
| Chr06                                                                                                          | 28660694-28680694          | Qrob_P0684330.2       | Cycloartenol synthase 2                                    | Sterol or triterpenoid synthesis, pollen development         | 13               | Complex                   |
| Chr06                                                                                                          | 28690694-28710694          | Qrob_P0684400.2       | Cycloartenol synthase 2                                    | Sterol or triterpenoid synthesis, pollen development         | 0                | Shared                    |
| Chr06                                                                                                          | 28770694-28810694          | Qrob_P0684360.2       | Cycloartenol synthase 2                                    | Sterol or triterpenoid synthesis, pollen development         | 0                | Shared                    |
| <i>Pollen recognition &amp; seed germination (G-type lectin S-receptor-like Serine/threonine kinase genes)</i> |                            |                       |                                                            |                                                              |                  |                           |
| Chr03                                                                                                          | 26118565-26138565          | Qrob_P0538230.2       | G-type lectin S-receptor-like STK At2g19130                | Putatively involved in recognition of pollen                 | 0                | Complex                   |
| Chr05                                                                                                          | 4001785-4021785            | Qrob_P0641650.2       | G-type lectin S-receptor-like STK At1g11300                | Putatively involved in recognition of pollen                 | 190              | Complex                   |
| Chr06                                                                                                          | 1453464-1473464            | Qrob_P0430150.2       | G-type lectin S-receptor-like STK LECRK                    | Regulates expression of immunity genes & seed germination    | 36               | Q. pyrenaica-specific     |
| Chr06                                                                                                          | 1513464-1563464            | Qrob_P0430190.2       | G-type lectin S-receptor-like STK LECRK                    | Regulates expression of immunity genes & seed germination    | 36               | Q. pyrenaica-specific     |
| Chr08                                                                                                          | 1749735-1769735            | Qrob_P0138480.2       | G-type lectin S-receptor-like STK LECRK                    | Regulates expression of immunity genes & seed germination    | 36               | Q. pyrenaica-specific     |
| <i>Embryo development &amp; organogenesis</i>                                                                  |                            |                       |                                                            |                                                              |                  |                           |
| Chr12                                                                                                          | 30514806-30534806          | Qrob_P0436820.2       | Transcriptional corepressor LEUNIG-like isoform            | Leaf, flower (gynoecium) and embryo development              | 5                | All except. Q. pub/Q. rob |
| Chr02                                                                                                          | 31611918-31651918          | Qrob_P0297580.2       | CHD3-type chromatin-remodeling factor PICKLE               | Repressor of LEC1, activator of embryo development           | 0                | Complex                   |
| Chr06                                                                                                          | 43006752-43026752          | Qrob_P0309300.2       | Probable N-acetyltransferase HLS1-like                     | Auxin-responsive gene expression, shoot organogenesis        | 1                | All except. Q. rob/Q. pub |
| Chr08                                                                                                          | 49805801-49825801          | Qrob_P0248780.2       | Receptor-like protein 12 (RLP12)                           | Meristem maintenance control, organogenesis                  | 0                | Complex                   |
| <i>Photoreceptor &amp; UV-B tolerance</i>                                                                      |                            |                       |                                                            |                                                              |                  |                           |
| Chr02                                                                                                          | 37788250-37808250          | Qrob_P0338870.2       | Ultraviolet-B receptor UVR8                                | Photoreceptor/response to UV, circadian clock, stomata       | 2                | Shared                    |
| Chr03                                                                                                          | 34667252-34687252          | Qrob_P0500290.2       | DNA mismatch repair protein MSH2                           | UV-B-induced DNA damage response pathway                     | 0                | Shared                    |
| Chr06                                                                                                          | 11400887-11420887          | Qrob_P0577750.2       | Transcription factor MYB12                                 | Positive regulator of flavonoid biosynthesis, UV-B tolerance | 0                | All except. Q. rob/Q. pet |

|                                                      |                     |                 |                                                          |                                                               |   |                                  |
|------------------------------------------------------|---------------------|-----------------|----------------------------------------------------------|---------------------------------------------------------------|---|----------------------------------|
| <b><i>Ecological barriers - abiotic stresses</i></b> |                     |                 |                                                          |                                                               |   |                                  |
| <u><i>Nramp metal transporters</i></u>               |                     |                 |                                                          |                                                               |   |                                  |
| Chr09                                                | 7739510-7759510     | Qrob_P0191830.2 | Metal transporter Nramp5                                 | Manganese and cadmium uptake                                  | 8 | <b>Q. pubescens-specific</b>     |
| Chr06                                                | 38764748-38784748   | Qrob_P0097150.2 | Metal transporter Nramp6                                 | Involved in iron ion homeostasis                              | 1 | <b>All except. Q. rob/Q. pet</b> |
| <u><i>Dehydration/lateral root growth</i></u>        |                     |                 |                                                          |                                                               |   |                                  |
| Chr08                                                | 68418235-68443235   | Qrob_P0457680.2 | Protein DEHYDRATION-INDUCED 19-like                      | Stress-induced sensor, interacting with CPK11 & S-Rnase       | 0 | <b>All except. Q. rob/Q. pet</b> |
| Chr02                                                | 27061274-27081274   | Qrob_P0304800.2 | Transcription factor WER                                 | Controls cell fate specification, e.g. hairy roots or stomata | 0 | <b>All except. Q. rob/Q. pet</b> |
| Chr02                                                | 28240136-28260136   | Qrob_P0299670.2 | Root Primordium Defective 1 (RPD1)                       | Lateral root morphogenesis; active cell proliferation         | 0 | Complex                          |
| Chr02                                                | 36392234-36442234   | Qrob_P0422470.2 | Alkaline/neutral invertase CIN2                          | Regulator of root growth, sucrose catabolism                  | 7 | Shared                           |
| Chr09                                                | 19506093-19526093   | Qrob_P0418880.2 | 1-aminocyclopropane-1-carboxylate synthase               | Ethylene biosynthetic process, lateral root formation         | 4 | <b>All except. Q. rob/Q. pet</b> |
| Chr04                                                | 19182244-19222244   | Qrob_P0652510.2 | Phosphatidylinositol-3-phosphatase myotubularin-1 (or 2) | Role in soil-water-deficit stress                             | 2 | Shared                           |
| Chr02                                                | 96008743-96028743   | Qrob_P0387640.2 | Protein WVD2-like 6                                      | Organ stockiness (periph. root cap, trichomes & leafs)        | 0 | <b>All except. Q. rob/Q. pet</b> |
| <u><i>Freezing/cold adaptation</i></u>               |                     |                 |                                                          |                                                               |   |                                  |
| Chr09                                                | 18536093-18556093   | Qrob_P0768740.2 | Dehydration-responsive element-binding protein 1         | Key role in freezing tolerance and cold acclimation           | 6 | Complex                          |
| Chr02                                                | 112153196-112173196 | Qrob_P0339800.2 | B3 domain-containing transcription factor VRN1           | Vernalization responsiveness, repressor of FLC                | 3 | <b>All except. Q. pub/Q. pet</b> |
| <b><i>Ecological barriers - biotic stresses</i></b>  |                     |                 |                                                          |                                                               |   |                                  |
| <u><i>Pathogen resistance/mycorrhization</i></u>     |                     |                 |                                                          |                                                               |   |                                  |
| Chr10                                                | 12310682-12340682   | Qrob_P0070130.2 | Transportin MOS14                                        | Plant immunity (splicing of resistant genes)                  | 0 | <b>Q. pyrenaica-specific</b>     |
| Chr01                                                | 26763631-26783631   | Qrob_P0648170.2 | Ubiquitin carboxyl-terminal hydrolase 12-like            | Protein deubiquitination, regulator of disease resistance     | 3 | Complex                          |
| Chr05                                                | 3053435-3073435     | Qrob_P0622110.2 | Nodulation-signaling pathway 1 (NSP1)                    | Nodulation & mycorrhization                                   | 0 | Complex                          |

# Species-specific ecological and non-ecological reproductive barriers

Unlike studies aiming at interpreting every region enriched in outliers, our objective was rather to focus on genes displaying distinct patterns among pairs of species. This is especially important since these situations are unexpected to arise via background selection (see *Online Results* for details). After excluding genes with a “shared” pattern, several different situations were observed (Table S4): (i) 9 regions enriched in outliers for all but one pair of species (including 7 regions for all pairs except *Q. robur* – *Q. petraea* and 2 regions for all pairs except *Q. pubescens* – *Q. pyrenaica* pairs), (ii) 5 regions specific to all pairs sharing the same species (4 for *Q. pyrenaica* and 1 for *Q. pubescens*) and (iii) 11 regions with more complex patterns.

Among the nine regions with an “all-versus-one-pair” relationship, seven excluded the *Q. robur*/*Q. petraea* pair and the other two excluded the *Q. pubescens*/*Q. pyrenaica* pair. Four of the seven genes for which the *Q. robur*/*Q. petraea* pair was excluded are known to be involved in drought tolerance or in lateral root growth (Table 2). This pattern is consistent with the higher drought tolerance of *Q. pyrenaica* and *Q. pubescens* compared to *Q. petraea* or *Q. robur* [19]. Reciprocally, we observed an “all vs. one” pattern (undetected for the *Q. robur*/*Q. petraea* pair) for a VRN1 gene involved in responsiveness to vernalization and known to play a key role in cold acclimation in many plant species [20]. Overall, the genomic variation of these nine genes parallels the Northern-Southern distribution of the studied species, suggesting that the underlying barriers are driven by climate preferences (Fig 1 A, B).

Among the five genes with branch-specific patterns, *i.e.* found in all pairs containing a given species, four have *Q. pyrenaica*-specific patterns and concerned genes involved in plant immunity, including three encoding G-type lectin S-receptor-like serine/threonine kinases (LECRKs) and one encoding a transportin (MOS14). *Q. pyrenaica* is extremely sensitive to oak powdery mildew, a pathogen that was introduced

into Europe at the start of the 20th century [21]. Soon after the first detection of the fungus in Europe, high mortality rates were reported for *Q. pyrenaica* in the humid warm-temperate forests of Southwestern and Western France [21 and references therein]. *Q. pyrenaica*-specific alleles at several genes involved in immunity may, therefore, be the signature of the high susceptibility of *Q. pyrenaica* to biotic stresses in moist environments. Additionally, we identified a *Q. pubescens*-specific pattern for a gene encoding a metal transporter (Nramp5) involved in the assimilation of manganese and cadmium in rice and barley [22]. Manganese assimilation is known to be essential for many plant functions, but manganese availability in the soil tends to decrease with increasing pH, and becomes limiting beyond a soil pH of 6.5. This gene probably signs the greater ecological preference of *Q. pubescens* for lime-rich soils (Fig 1B) in comparison to the other three species.

Among genes with complex patterns, we identified many candidate genes for intrinsic pre-mating and post-mating barriers. We identified several genes involved in the timing of flowering, including APETALA2 and PRR73. APETALA2 is a key transcription factor for the establishment of the floral meristem [23]. Similarly, PRR73 contributes to flowering time variation in barley and wheat [24 and references therein]. Several species-specific genes may also be involved in mating barriers, including previously described ecological genes with pleiotropic effects, such as *VRN1*. In addition to its primary role in vernalization, *VRN1* is involved in the repression of *FLC* (itself a known repressor of flowering) in *Arabidopsis*, through a vernalization-independent floral pathway [20]. Several of the candidate genes for intrinsic barriers identified are involved in pollen or embryo development, suggesting that both pre-mating and post-mating intrinsic barriers operate in oaks. Three of these genes encode cycloartenol synthases known to be essential for pollen development in *Arabidopsis* [25].

## DISCUSSION

The increasing availability of genomic resources for phylogenetically related species has the potential to greatly improve our understanding of their evolutionary trajectories and the molecular basis of their reproductive isolation as shown here for European temperate oaks. Our demographic reconstruction supports long periods of isolation between these oak species for most of their history leading to the gradual loss of shared alleles and the accumulation of reproductive barriers. We further found evidence of a systematic shift in their trajectories that occurred towards the beginning of the Holocene. More precisely, this shift took place while the oak species were migrating northwards as the climate became warmer, and resulting in their encountering in central Europe. In line with our previous conclusions [11], our inferences cannot however exclude that a few secondary contact periods had already taken place earlier. Still, the mixture of different species and populations in central Europe occurring during the Holocene was so massive that private (or near private alleles) were redistributed among interfertile species. Indeed, current levels of interspecific differentiation are extremely low along almost all the genome (mean interchromosomal 10-kb estimates of  $F_{ST}$  below 0.08 for all pairs), at a level compatible with many reports of within-species population structure in the literature [26]. However, at some narrow regions distributed throughout the genome, interspecific differentiation reaches extremely high levels (10-kb estimates of  $F_{ST}$  above 0.8). These peaks most likely correspond to narrow regions where selection counteracted the homogenizing effect of gene flow, thus leading to the present-day highly heterogeneous landscape of differentiation.

The highest differentiated SNPs contributing to reproductive barriers mostly set apart Southern (*Q. pyrenaica* & *Q. pubescens*) from Northern species (*Q. robur* & *Q. petraea*). While this observation is inconsistent with the inferred phylogeny (ref. 11; Fig. 1C), it however coincides with the climatic preferences of the four species (Fig 1 A,B). We

also found genetic support for *Q. pubescens* preference for alkaline soils. When comparing the genomic footprints of differentiation between *Q. pyrenaica* and the other three species, we found genes involved in plant immunity, in line with previous reports for higher mortality rates in this species due to pathogens [21]. Finally our results also show that peaks of differentiation never reach fixation, even in regions exhibiting the strongest reproductive barriers. The possibility for a very low permeability to gene flow at these barriers therefore calls for more research about the maintenance and evolution of reproductive isolation between European white oaks.

Overall, our results suggest that key selective abiotic and biotic factors triggered by post glacial environmental changes have molded the extant landscape of species reproductive barriers in European temperate oak species. We anticipate that these drivers will operate during ongoing climate changes as Mediterranean oak species (*Q. pyrenaica* & *Q. pubescens*) are migrating northwards getting in contact in more Northern latitudes with local temperate species (*Q. petraea* and *Q. robur*).

## METHODS

### *Ecological niche of the four species*

#### *French data*

We delineated the extant ecological niche of the four oak species in France (Fig S4) by using their distribution maps based on the National Forest Inventory and climatic data extracted from the Chelsa data base [27]. In addition to the climatic data we added pH values of the soil. Proxies of pH values were derived from floristic data the National Forest inventory floristic plots installed since 2005. Floristic composition of these inventory plots was compared to existing database to calculate proxys of pH values [28]. We intersected the distribution maps with the climatic rasters (30" resolution) and



calculated a 2D density plot of species presence in the climatic (mean temperature and precipitation) and pH domain using the R package “ggplot2” v. 2.2.1 [29] under R v. 3.2.2

## *European data*

European distributions maps were constructed based on presence data of species made available by the European atlas of forest tree species [30]. Climatic data are based on the Chelsa database [27] and soil pH were derived from JCR data [31]. Since both data origin from different geographical sites, we only computed univariate density distributions using ggplot2, after using a similar procedure than for the French data.

## *Sampling and sequencing*

We sampled populations of the four *Quercus* species in stands of natural origin located in South-West France. We sampled 13 *Q. petraea* trees in Laveyron (Landes, France), and 20 *Q. robur* and 20 *Q. pyrenaica* trees from the Landes EVOLTREE “Intensive Study Site” (ISS). We also sampled 18 *Q. pubescens* trees from two sites in Gironde: 12 in Branne and 6 in Blaignan (Gironde, France) (see Table S5 for details). *Online Methods* contains detailed information on the methodologies used from DNA extraction to sequencing. Overall, between 1,617,465,418 and 1,813,403,677 reads per pool were retained for analysis, corresponding to 313 Gb (425X) to 356 Gb (483X) of raw data. Raw data have been deposited in the Sequence Read Archive (SRA): ERP105626.

## **Mapping and calling**

All reads were then mapped against the v2.3 oak haplome assembly [10], with bowtie2 v. 2.1.0 [31], using standard parameters for the “sensitive end-to-end” mode. PCR duplicates were removed with Picard v. 1.106

(<http://broadinstitute.github.io/picard/>). Samtools v.1.1 [32] and Popoolation2 v. 1.201 [33] were then used to call biallelic SNPs with at least 10 alternate alleles and a depth between 50 and 2000X at each position. To ensure a reasonably low rate of false positives due to Illumina sequencing errors, all SNPs with a MAF lower than 0.02 were discarded. We obtained allele counts for a total of 31,894,340 SNPs. Sliding-window  $F_{ST}$  were calculated from allele frequencies with the popoolation2 bioinformatics software suite [33].

### Demographic inferences & genome scans

We used a strategy combining ABC [11, 26] and backward simulations to scan genomes for reproductive barriers (Fig. 2). The ABC approach explicitly takes into account confounding effects of barriers to gene flow [34] and linked selection [26, 35] on demographic inferences. This was done by modeling among loci variation in (i) effective migration rate to take into account barriers to migration [36] and (ii) effective population size to take into account linked selection [37]. *Online Methods* contains detailed information on the methodologies used for demographic inferences and genome scans.

### Functional annotations

For all genes found within regions enriched in outliers, we conducted BlastP searches in both the SwissProt and nr protein databases. Only BlastP results with e-values lower than  $10e-5$  were considered for protein function annotation. After identification of the protein function by BlastP analyses, extensive manual literature searches were performed. We also reported information from a previous identification of orthologous and paralogous genes in 16 plant species, including *Q. robur*, performed with OrthoMCL (see ref. 10, for details).

## REFERENCES

1. Denk, T., Grimm, G. W., Manos, P. S., Deng, M. & Hipp, A. L. An Updated Infrageneric Classification of the Oaks: Review of Previous Taxonomic Schemes and Synthesis of Evolutionary Patterns. in *Oaks Physiological Ecology. Exploring the Functional Diversity of Genus Quercus L.* (eds. Gil-Pelegrín, E., Peguero-Pina, J. J. & Sancho-Knapik, D.) 13–38 (Springer International Publishing, 2017). doi:10.1007/978-3-319-69099-5\_2
2. Hubert, F. et al. Multiple nuclear genes stabilize the phylogenetic backbone of the genus *Quercus*. *Syst Biodivers.* 12, 405–423 (2014).
3. Darwin, C. *On the Origin of Species by Means of Natural Selection: Or the Preservation of Favoured Races in the Struggle for Life.* (D. Appleton, 1869).
4. Palmer, E. J. HYBRID OAKS OF NORTH AMERICA. *J. Arnold Arbor* 29, 1–48 (1948).
5. Rieseberg, L. H., Wood, T. E. & Baack, E. J. The nature of plant species. *Nature* 440, 524–527 (2006).
6. Lepais, O. et al. Species relative abundance and direction of introgression in oaks. *Mol Ecol.* 18, 2228–2242 (2009).
7. Petit, R. J. et al. Chloroplast DNA variation in European white oaks: Phylogeography and patterns of diversity based on data from over 2600 populations. *Forest Ecol Manag.* 156, 5–26 (2002).
8. Petit, R. J. et al. Chloroplast DNA footprints of postglacial recolonization by oaks. *Proc Natl Acad Sci USA.* 94, 9996–10001 (1997).
9. Plomion, C. et al. Decoding the oak genome: public release of sequence data, assembly, annotation and publication strategies. *Mol Ecol Resour.* 16, 254–265 (2016).
10. Plomion, C. et al. Oak genome reveals facets of long lifespan. *Nat Plants* (in press).

- 360 11.Leroy, T. et al. Extensive recent secondary contacts between four European white oak  
361 species. *New Phytol* 214, 865–878 (2017).
- 362 12.Abadie, P. et al. Strength, diversity and plasticity of postmating reproductive barriers  
363 between two hybridizing oak species (*Quercus robur* L. and *Quercus petraea* (Matt)  
364 Liebl.). *J Evol Biol* 25, 157–173 (2012).
- 365 13.Lepais, O., Roussel, G., Hubert, F., Kremer, A. & Gerber, S. Strength and variability  
366 of postmating reproductive isolating barriers between four European white oak species.  
367 *Tree Genet Genomes* 9, 841–853 (2013).
- 368 14.Eaton, E, Caudullo, G, Oliveira, S & de Rigo, D. *Quercus robur* and *Quercus petraea*  
369 in Europe: distribution, habitat, usage and threats. in European Atlas of Forest Tree  
370 Species (San-Miguel-Ayanz, J, de Rigo D, Caudullo G, Houston Durrant T, Mauri A,  
371 2016).
- 372 15.Timbal, J & Aussenac, G. 1.Eaton, E, Caudullo, G, Oliveira, S & de Rigo, D. *Quercus*  
373 *robur* and *Quercus petraea* in Europe: distribution, habitat, usage and threats. in  
374 European Atlas of Forest Tree Species (San-Miguel-Ayanz, J, de Rigo D, Caudullo G,  
375 Houston Durrant T, Mauri A, 2016).
- 376 16.Hewitt, G. M. Hybrid zones: natural laboratories for evolutionary studies. *Trends Ecol*  
377 *& Evol* 3, 158–167 (1988).
- 378 17.Hipp, A. L. et al. Sympatric parallel diversification of major oak clades in the  
379 Americas and the origins of Mexican species diversity. *New Phytol* 217, 439–452 (2018).
- 380 18.Gregorius H.-R., Degen B. & König A. Problems in the Analysis of Genetic  
381 Differentiation Among Populations – a Case Study in *Quercus robur*. *Silvae Genet* 56,  
382 190 (2007).

383 19.Fonti, P., Heller, O., Cherubini, P., Rigling, A. & Arend, M. Wood anatomical  
384 responses of oak saplings exposed to air warming and soil drought. *Plant Biol* 15, 210–  
385 219 (2013).

386 20.Levy, Y. Y., Mesnage, S., Mylne, J. S., Gendall, A. R. & Dean, C. Multiple Roles of  
387 *Arabidopsis VRN1* in Vernalization and Flowering Time Control. *Science* 297, 243  
388 (2002).

389 21.Desprez-Loustau, M.-L., Feau, N., Mougou-Hamdane, A. & Dutech, C. Interspecific  
390 and intraspecific diversity in oak powdery mildews in Europe: coevolution history and  
391 adaptation to their hosts. *Mycoscience* 52, 165–173 (2011).

392 22.Wu, D. et al. The HvNramp5 Transporter Mediates Uptake of Cadmium and  
393 Manganese, But Not Iron. *Plant Physiol* 172, 1899–1910 (2016).

394 23.Irish, V. F. & Sussex, I. M. Function of the *apetala-1* gene during *Arabidopsis* floral  
395 development. *Plant Cell* 2, 741–753 (1990).

396 24.Higgins, J. A., Bailey, P. C. & Laurie, D. A. Comparative Genomics of Flowering Time  
397 Pathways Using *Brachypodium distachyon* as a Model for the Temperate Grasses. *PLOS*  
398 *ONE* 5, e10065 (2010).

399 25.Babychuk, E. et al. Allelic mutant series reveal distinct functions for *Arabidopsis*  
400 cycloartenol synthase 1 in cell viability and plastid biogenesis. *Proc Natl Acad Sci USA*.  
401 105, 3163–3168 (2008).

402 26.Roux, C. et al. Shedding Light on the Grey Zone of Speciation along a Continuum of  
403 Genomic Divergence. *PLOS Biol* 14, e2000234 (2016).

404 27.Karger, D. N. et al. Climatologies at high resolution for the earth's land surface areas.  
405 *Scientific Data* 4, 170122 (2017).

406 28.Gégout Jean-Claude, Coudun Christophe, Bailly Gilles & Jabiol Bernard. EcoPlant: A  
407 forest site database linking floristic data with soil and climate variables. *J Veg Sci* 16,  
408 257–260 (2009).

409 29.Wickham, H. ggplot2: Elegant Graphics for Data Analysis. (Springer-Verlag New  
410 York, 2009).

411 30.San-Miguel-Ayanz, J. et al. European atlas of forest tree species. (Publications Office  
412 of the European Union, 2016). doi:10.2788/4251

413 31.Langmead, B., Trapnell, C., Pop, M. & Salzberg, S. L. Ultrafast and memory-efficient  
414 alignment of short DNA sequences to the human genome. *Genome Biol* 10, R25 (2009).

415 32.Li, H. A statistical framework for SNP calling, mutation discovery, association  
416 mapping and population genetical parameter estimation from sequencing data.  
417 *Bioinformatics* 27, 2987–2993 (2011).

418 33.Kofler, R., Pandey, R. V. & Schlötterer, C. PoPoolation2: identifying differentiation  
419 between populations using sequencing of pooled DNA samples (Pool-Seq). *Bioinformatics*  
420 27, 3435–3436 (2011).

421 34.Roux, C., Tsagkogeorga, G., Bierne, N. & Galtier, N. Crossing the species barrier:  
422 genomic hotspots of introgression between two highly divergent *Ciona intestinalis*  
423 species. *Mol Biol Evol* 30, 1574–1587 (2013).

424 35.Schrider, D. R., Shanku, A. G. & Kern, A. D. Effects of Linked Selective Sweeps on  
425 Demographic Inference and Model Selection. *Genetics* 204, 1207–1223 (2016).

426 36.Barton, N. & Bengtsson, B. O. The barrier to genetic exchange between hybridising  
427 populations. *Heredity* 57, 357 (1986).

428 37.Charlesworth, B., Morgan, M. T. & Charlesworth, D. The Effect of Deleterious  
429 Mutations on Neutral Molecular Variation. *Genetics* 134, 1289–1303 (1993).

## ACKNOWLEDGMENTS

This research was funded by the French ANR (GENOAK project, 11-BSV6-009-021) and by the European Research Council under the European Union's Seventh Framework Programme (TREEPEACE project, FP/2014-2019; ERC Grand Agreement no. 339728). We thank the Genotoul Bioinformatics Platform Toulouse Midi-Pyrenees (Bioinfo Genotoul) and the Biogenouest BiRD core facility (Université de Nantes) for providing computing and storage resources. We also thank Jorge A. P. Paiva for providing access to *Q. suber* data and Camille Roux for fruitful discussions concerning ABC. We would like to thank fellow members of the pedunculate oak genome consortium for helpful advice and suggestions.
